# Supplementary material for: Orai–vascular endothelial-cadherin signaling complex regulates high-glucose exposure-induced increased permeability of mouse aortic endothelial cells
Source: PubMed Central journal article supplement — BMJ Open Diabetes Res Care. 2021 Apr 22;9(1):e002085. doi: 10.1136/bmjdrc-2020-002085 (PMC8070857; doi:10.1136/bmjdrc-2020-002085), 2021-04-22
Supplement: bmjdrc-2020-002085supp001.pdf [file bmjdrc-2020-002085supp001.pdf]

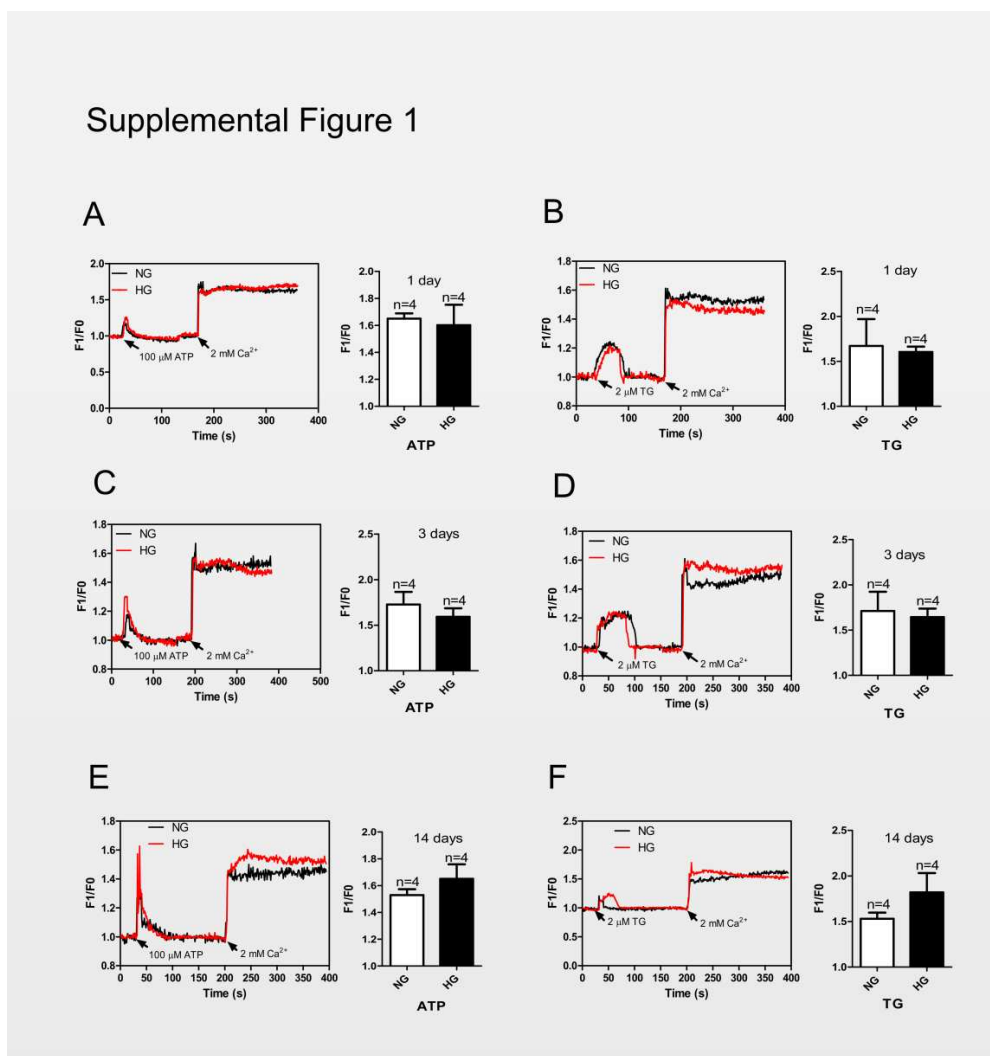

**Supplemental Figure 1. SOCE is not changed in MAECs cultured in HG for 1, 3, or 14 days.** Representative traces and summary data showing store-operated Ca<sup>2+</sup> entry (SOCE) changes in mouse aortic endothelial cells (MAECs) cultured in normal glucose (NG) or high glucose (HG). After 100 μM ATP or 2 μM TG treatment for 10 min, the application of 2 mM Ca<sup>2+</sup> induces SOCE similarly in cells cultured in medium with NG or HG. Values are means ± standard error of the mean (SEM) (n =4 samples). *P* > 0.05 compared with cells cultured in NG.

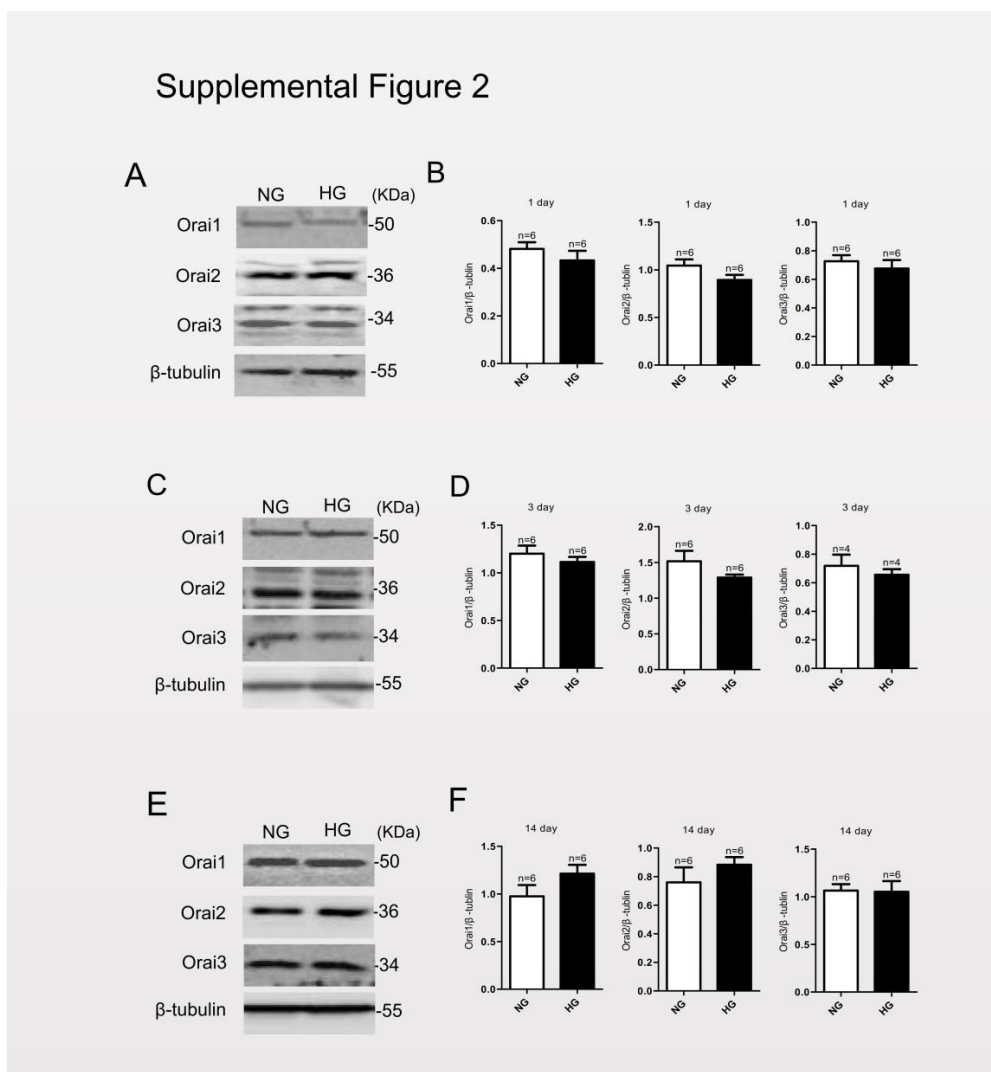

**Supplemental Figure 2. Expression levels of Orai proteins are not all significantly changed in MAECs cultured in high glucose (HG) vs. normal glucose (NG) for 1, 3, or 14 days.** Representative western blot images (A, day 1; C, day 3; and E, day 14) and summary data (B, day 1; D, day 3; and F, day 14) of Orai1–3 protein expression levels in mouse aortic endothelial cells (MAECs) cultured in normal-glucose (NG) or high-glucose (HG) medium.  $\beta$ -tubulin was used as the loading control. Values are means  $\pm$  SEM (n = 4–6 samples).  $P > 0.05$  compared with NG-cultured cells.

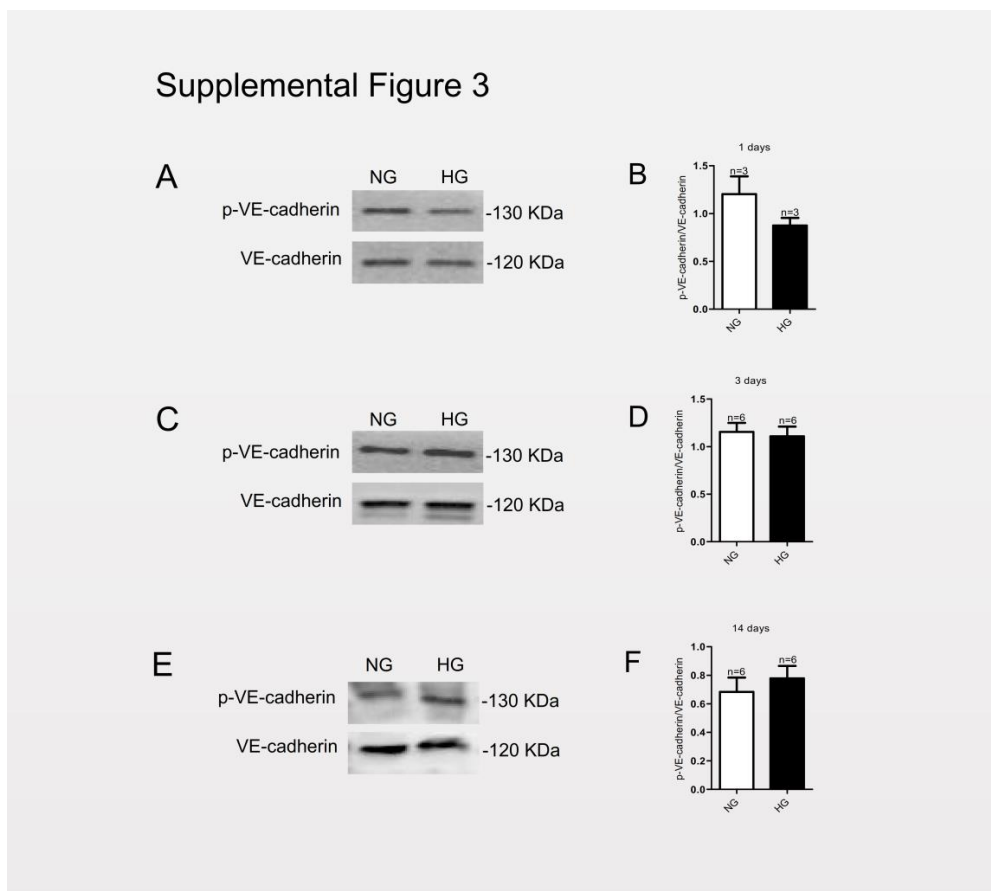

**Supplemental Figure 3. The ratio of p-VE-cadherin to VE-cadherin expressed on the cell membrane are not significantly changed in MAECs cultured in high glucose (HG) vs. normal glucose (NG) for 1, 3, or 14 days.** Representative western blot images (A, day 1; C, day 3; and E, day 14) and summary data (B, day 1; D, day 3; and F, day 14) of Orai1–3 protein expression levels in mouse aortic endothelial cells (MAECs) cultured in normal-glucose (NG) or high-glucose (HG) medium. Values are means  $\pm$  SEM (n = 3-6 samples).  $P > 0.05$  compared with NG-cultured cells.
